# Supplementary material
Source: publisher figshare collection journal article supplement (https://sage.figshare.com/ndownloader/files/42550470)
Supplement: Supplementary file 1 [file 42550470]

Appendix

Figure 1: The Pearson χ2 goodness-of-fit statistic against the predicted probability of a positive outcome *before* removal of influential observations.

Figure 2: The Pearson χ2 goodness-of-fit statistic against the predicted probability of a positive outcome *after* removal of influential observations.
